# Supplementary material for: Antipsychotic Medication Use Among Publicly Insured Pregnant Women in the United States
Source: Atypon-hosted journal article supplement (doi:10.1176/appi.ps.201600408), 2017-06-15
Supplement: appi.ps.201600408.ds001.pdf [file appi.ps.201600408.ds001.pdf]

## **Antipsychotic Medication Use among Publicly-insured Pregnant Women in the US**

### **Supplementary Material**

Figure S1. Proportion of women who were dispensed an atypical antipsychotic medication during pregnancy in Medicaid, 2001 to 2010, by age and race categories

Figure S2. Discontinuation and initiation of antipsychotic medication during pregnancy, by generic medication

Table S1. List of ICD-9 diagnostic codes and specific antipsychotics in this study

Table S2. Patterns of antipsychotic switching in the first trimester among women receiving antipsychotic during baseline

# Supplementary Material

**Figure S1. Proportion of women who were dispensed an atypical antipsychotic medication during pregnancy in Medicaid, 2001 to 2010, by age and race categories**

A. By age groups

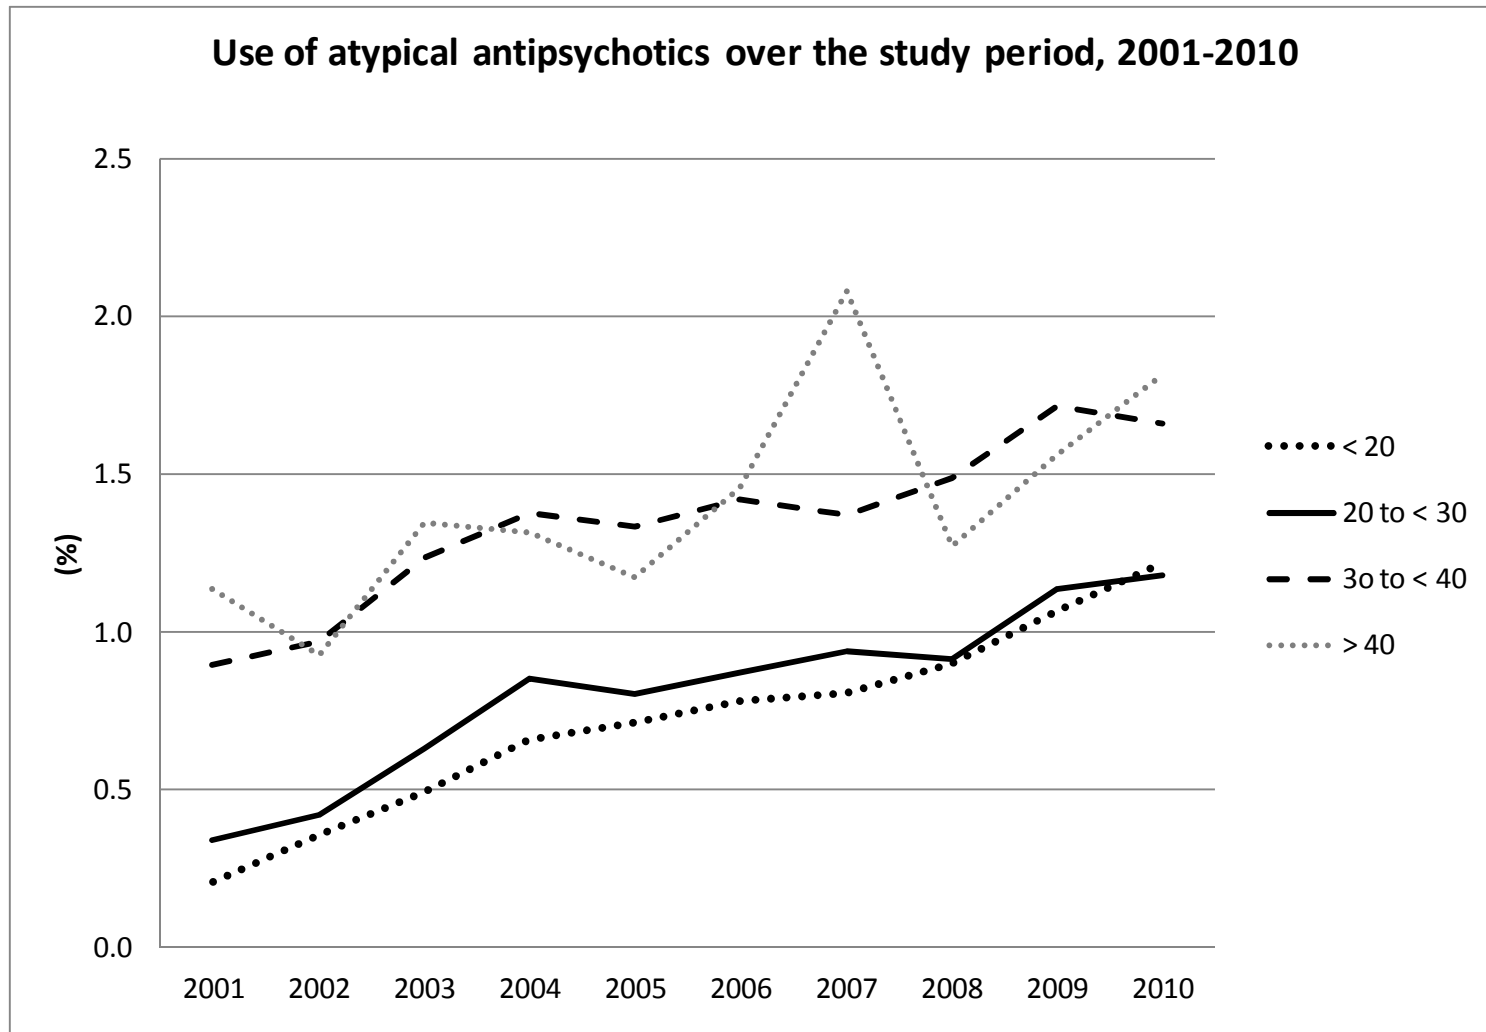

B. By race

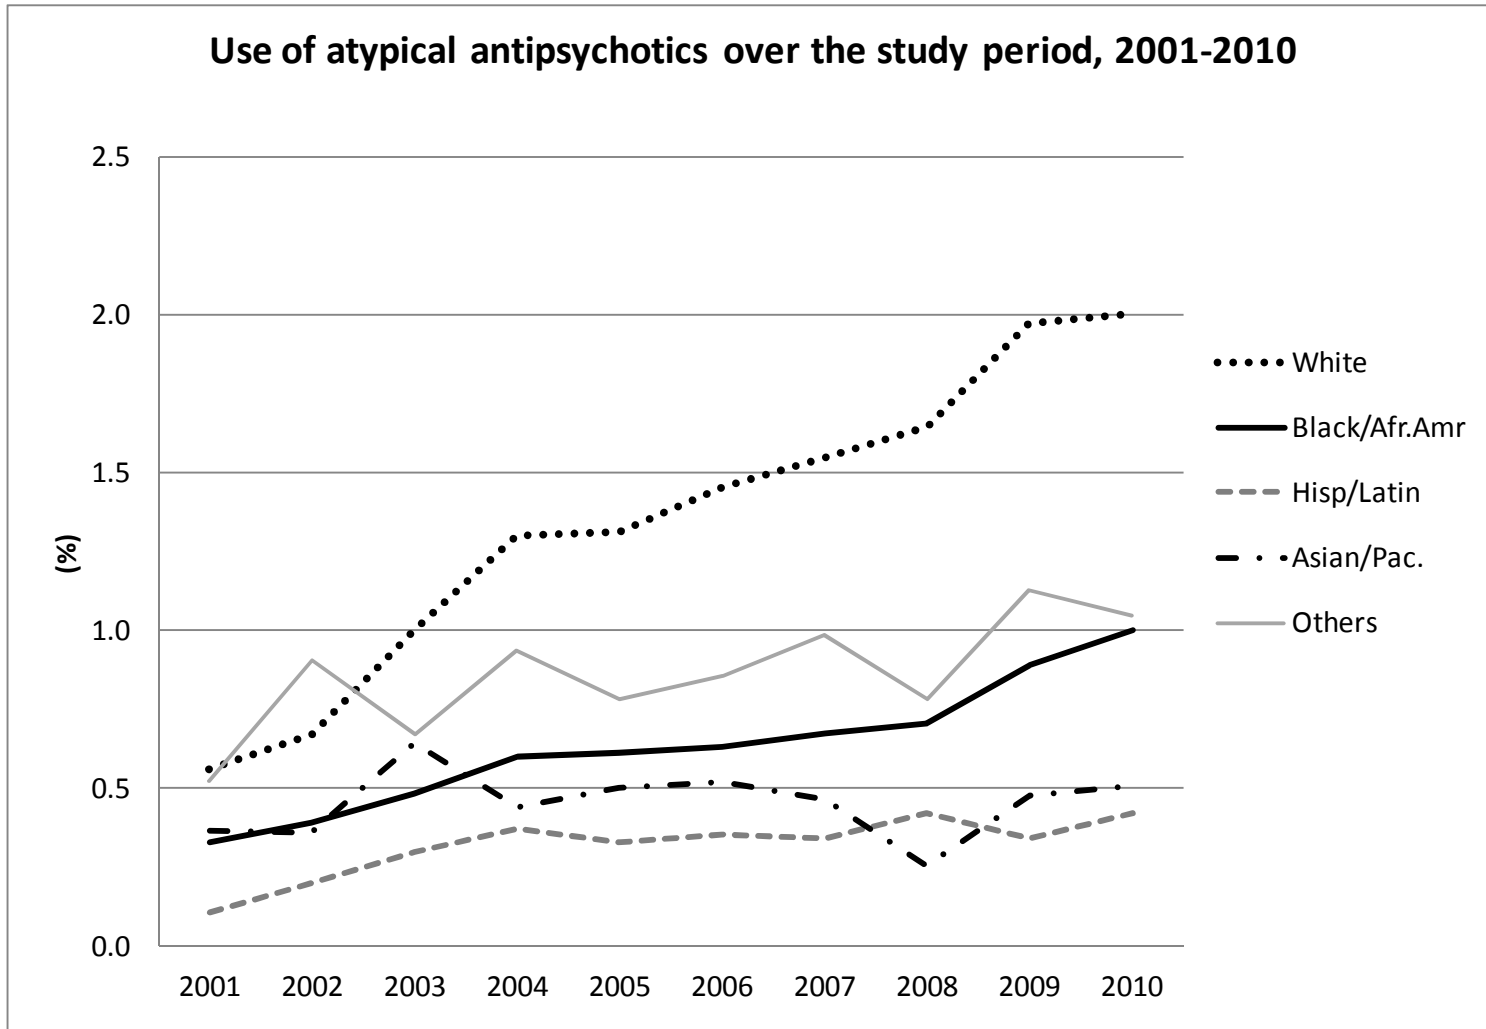

**Figure S2. Discontinuation and initiation of antipsychotic medication during pregnancy, by generic medication**

BL: baseline; T1: first trimester; T2: second trimester; T3: third trimester

Note that the y-axis scale is different for haloperidol

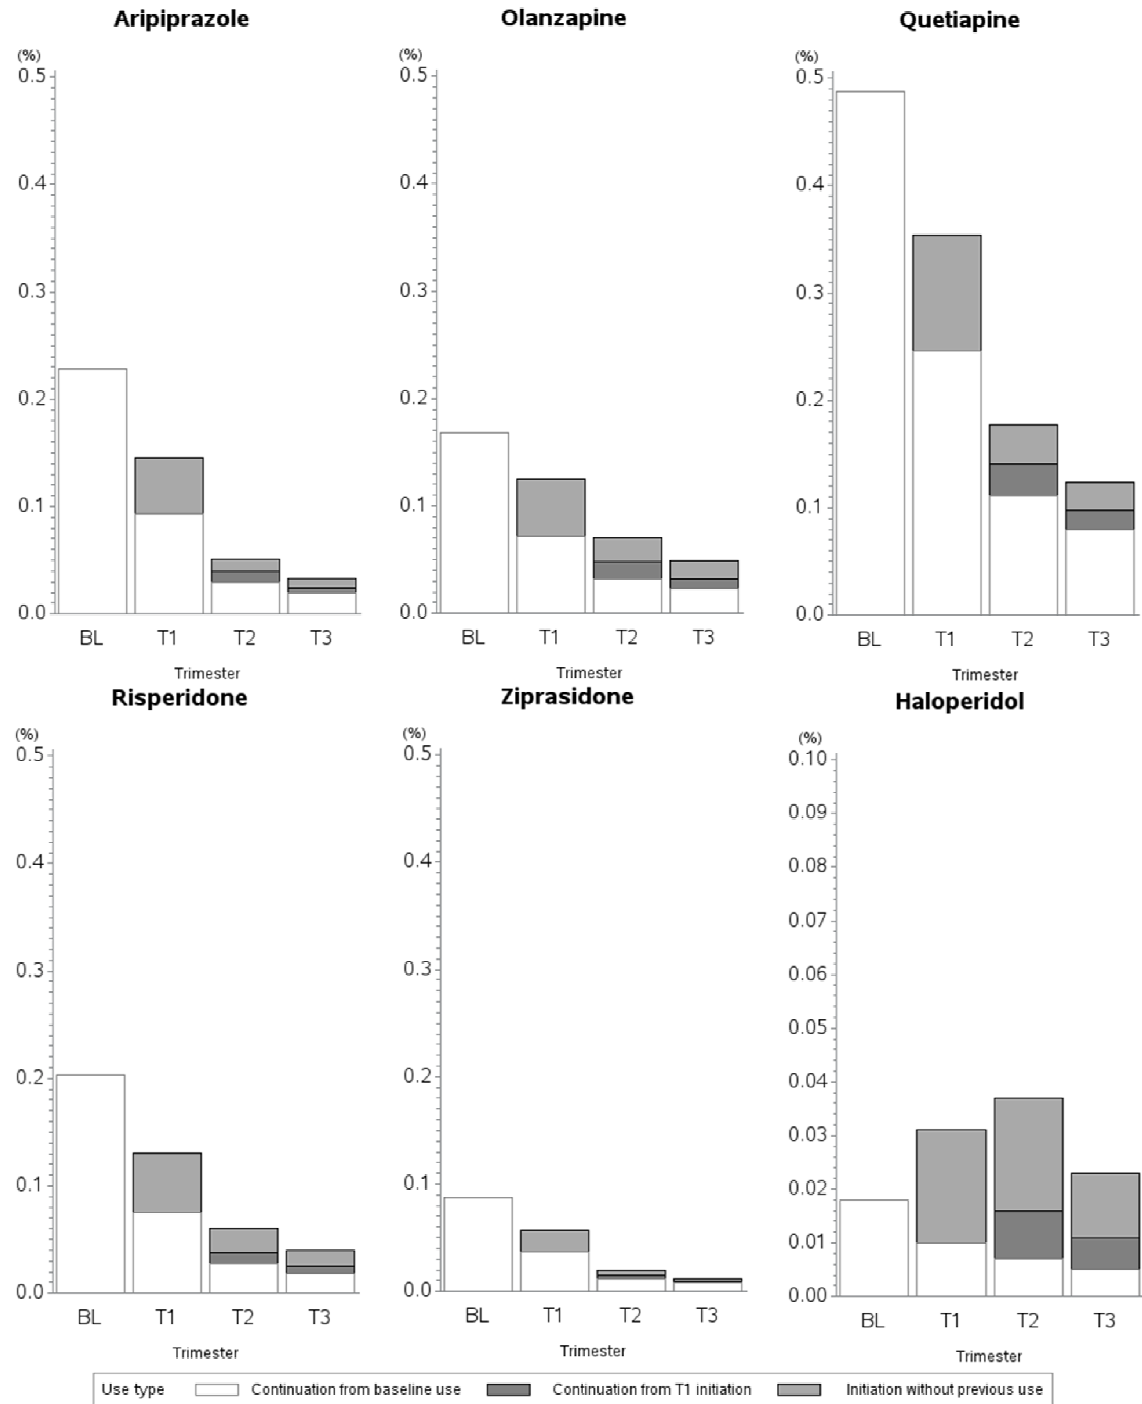

**Table S1. List of ICD-9 diagnostic codes and specific antipsychotics in this study**

| <b>Drug class</b>                                 | <b>Drug names</b>                                                                                                                                |
|---------------------------------------------------|--------------------------------------------------------------------------------------------------------------------------------------------------|
| <b>Atypical antipsychotic</b>                     | Aripiprazole, clozapine, olanzapine, paliperidone, quetiapine, risperidone, ziprasidone                                                          |
| <b>Typical antipsychotic</b>                      | Chlorpromazine, fluphenazine, haloperidol, loxapine, mesoridazine, molindone, perphenazine, pimozide, thioridazine, thiothixene, trifluoperazine |
| <b>Disease</b>                                    | <b>ICD-9 codes</b>                                                                                                                               |
| <b>ADHD</b>                                       | 312.xx, 314.xx                                                                                                                                   |
| <b>Anxiety Disorders</b>                          | 293.84, 300.0x, 300.2x, 300.3, 308.0, 309.24, 309.81, 313.0x                                                                                     |
| <b>Bipolar Disorders</b>                          | 296.0x, 296.1x, 296.4x, 296.5x, 296.6x, 296.7x, 296.8x, 296.99                                                                                   |
| <b>Depression</b>                                 | 293.83, 296.2x, 296.3x, 298.0x, 300.4x, 309.0x, 309.1x, 309.28, 311.xx                                                                           |
| <b>Schizophrenia or other psychotic disorders</b> | 290.8x, 290.9x, 295.xx, 297.xx, 298.xx, 299.xx, 780.1x                                                                                           |

ICD-9: International Classification of Diseases, Ninth Revision; ADHD: Attention-deficit hyperactivity disorder

**Table S2. Patterns of antipsychotic switching in the first trimester among women receiving antipsychotic during baseline**

|                      | Total Switcher (n) | <i>Medication switched<sup>a</sup> to during first trimester (% of total switchers)</i> |            |            |             |             |             |
|----------------------|--------------------|-----------------------------------------------------------------------------------------|------------|------------|-------------|-------------|-------------|
|                      |                    | Aripiprazole                                                                            | Olanzapine | Quetiapine | Risperidone | Ziprasidone | Haloperidol |
| <i>Baseline drug</i> |                    |                                                                                         |            |            |             |             |             |
| Aripiprazole         | 231                | -                                                                                       | 13.0       | 44.6       | 19.5        | 16.0        | 8.2         |
| Olanzapine           | 170                | 19.4                                                                                    | -          | 42.4       | 21.8        | 7.6         | 9.4         |
| Quetiapine           | 286                | 35.3                                                                                    | 19.6       | -          | 21.7        | 19.2        | 5.9         |
| Risperidone          | 266                | 25.2                                                                                    | 15.0       | 44.4       | -           | 10.5        | 9.8         |
| Ziprasidone          | 130                | 10.0                                                                                    | 9.2        | 32.3       | 3.8         | -           | 11.5        |
| Haloperidol          | 38                 | 10.5                                                                                    | 39.5       | 39.5       | 13.2        | 13.2        | -           |

<sup>a</sup> Switching defined as filling a prescription for a different antipsychotic but not for the one received during baseline
